# Supplementary material
Source: publisher site journal article supplement (https://www.dovepress.com/article/293577)
Supplement: Supplementary file 1 [file get_supplementary_file.php]

**Supplementary materials**

**Table S1:** **Standards for Reporting Diagnostic accuracy studies**(STARD) checklist****

|  | **Section & Topic** | **No** | **Item** | **Reported on page #** |
| --- | --- | --- | --- | --- |
|  |  |  |  |  |
|  | **TITLE OR ABSTRACT** |  |  |  |
|  |  | **1** | Identification as a study of diagnostic accuracy using at least one measure of accuracy (such as sensitivity, specificity, predictive values, or AUC) | 1 |
|  | **ABSTRACT** |  |  |  |
|  |  | **2** | Structured summary of study design, methods, results, and conclusions (for specific guidance, see STARD for Abstracts) | 1 |
|  | **INTRODUCTION** |  |  |  |
|  |  | **3** | Scientific and clinical background, including the intended use and clinical role of the index test | 1,2 |
|  |  | **4** | Study objectives and hypotheses | 2 |
|  | **METHODS** |  |  |  |
|  | *Study design* | **5** | Whether data collection was planned before the index test and reference standard were performed (prospective study) or after (retrospective study) | Prospective study, 2 |
|  | *Participants* | **6** | Eligibility criteria | Adults ≥40 years, not seriously ill, bed ridden or cognitively impaired, 2 |
|  |  | **7** | On what basis potentially eligible participants were identified  (such as symptoms, results from previous tests, inclusion in registry) | Eligibility criteria and a sample of participants from positive and negative results of initial screening test, i.e the lung function questionnaire score), 2 |
|  |  | **8** | Where and when potentially eligible participants were identified (setting, location and dates) | Rural setting in North India from September to October 2017, 3 |
|  |  | **9** | Whether participants formed a consecutive, random or convenience series | Random |
|  | *Test methods* | **10a** | Index test, in sufficient detail to allow replication | Lung function questionnaire followed by Pocket spirometry, 3 |
|  |  | **10b** | Reference standard, in sufficient detail to allow replication | Post-bronchodilation spirometry conducted by trained researchers using a diagnostic quality portable spirometer, COPD according to the GOLD guideline, 3 |
|  |  | **11** | Rationale for choosing the reference standard (if alternatives exist) | Suggested by GOLD criteria and simple to apply |
|  |  | **12a** | Definition of and rationale for test positivity cut-offs or result categories of the index test, distinguishing pre-specified from exploratory | 3 |
|  |  | **12b** | Definition of and rationale for test positivity cut-offs or result categories of the reference standard, distinguishing pre-specified from exploratory | 3 |
|  |  | **13a** | Whether clinical information and reference standard results were available to the performers/readers of the index test | No, 3 |
|  |  | **13b** | Whether clinical information and index test results were available to the assessors of the reference standard | No, 3 |
|  | *Analysis* | **14** | Methods for estimating or comparing measures of diagnostic accuracy | 6 |
|  |  | **15** | How indeterminate index test or reference standard results were handled | No indeterminate index test |
|  |  | **16** | How missing data on the index test and reference standard were handled | Not included in the analysis |
|  |  | **17** | Any analyses of variability in diagnostic accuracy, distinguishing pre-specified from exploratory | No |
|  |  | **18** | Intended sample size and how it was determined | 3 |
|  | **RESULTS** |  |  |  |
|  | *Participants* | **19** | Flow of participants, using a diagram | 4 |
|  |  | **20** | Baseline demographic and clinical characteristics of participants | 5 |
|  |  | **21a** | Distribution of severity of disease in those with the target condition | 6 |
|  |  | **21b** | Distribution of alternative diagnoses in those without the target condition | Not assessed |
|  |  | **22** | Time interval and any clinical interventions between index test and reference standard | Both the index test and reference standard tests were conducted on the same day within an hour, 3 |
|  | *Test results* | **23** | Cross tabulation of the index test results (or their distribution)  by the results of the reference standard | Not given |
|  |  | **24** | Estimates of diagnostic accuracy and their precision (such as 95% confidence intervals) | 6, table 3 |
|  |  | **25** | Any adverse events from performing the index test or the reference standard | No adverse event |
|  | **DISCUSSION** |  |  |  |
|  |  | **26** | Study limitations, including sources of potential bias, statistical uncertainty, and generalisability | 9 |
|  |  | **27** | Implications for practice, including the intended use and clinical role of the index test | 9 |
|  | **OTHER INFORMATION** |  |  |  |
|  |  | **28** | Registration number and name of registry | Not done |
|  |  | **29** | Where the full study protocol can be accessed | NA |
|  |  | **30** | Sources of funding and other support; role of funders | Yes |
|  |  |  |  |  |

Notes: Adapted from Cohen JF, Korevaar DA, Altman DG, et al. STARD 2015 guidelines for reporting diagnostic accuracy studies: explanation and elaboration. *BMJ Open*. 2016;6(11):e012799. Creative Commons Attribution Non Commercial (CC BY-NC 4.0); http://creativecommons.org/licenses/by-nc/4.0/.

Table S2: The diagnostic performance of COPD detection by individual community health workers using a pocket spirometer (PS) against the post-broncho-dilation spirometry

| LFTs | CHW*1 | CHW2 | CHW3 | CHW4 | CHW5 | CHW6 | CHW7 | CHW8 |
| --- | --- | --- | --- | --- | --- | --- | --- | --- |
| Number of PS | 50 | 30 | 52 | 48 | 22 | 17 | 14 | 2 |
| Sensitivity, %  (95% CI) | 70.6 (44-89.7) | 33.3 (0.84-90.6) | 81.8 (48.2-97.7) | 83.3 (35.9-99.6) | 100 (39.8-100) | 50 (11.8-88.2) | 57.1 (18.4-90.1) | Not calculated |
| Specificity, %  (95% CI) | 75.8 (57.7-88.9) | 92.6 (75.7-99.1) | 78.0 (62.4-89.4) | 83.3 (68.6-93.0) | 88.2 (63.6-98.5) | 63.6 (30.8-89.1) | 71.4 (29.0-96.3) | Not calculated |
| ROC area | 0.73 (0.60-0.87) | 0.63 (0.30-0.96) | 0.80 (0.66-0.94) | 0.83 (0.66-1.00) | 0.94 (0.86-1) | 0.57 (0.30-0.83) | 0.64 (0.38-0.91) | Not calculated |
| Likelihood ratio (+) | 2.9 (1.5-5.7) | 4.5 (0.56-36.1) | 3.7 (2.0-7.1) | 5.0 (2.3-10.7) | 8.5 (2.3-31.2) | 1.38 (0.5-4.2) | 2.0 (0.5-7.6) | Not calculated |
| Likelihood ratio (-) | 0.39 (0.18-0.83) | 0.72 (0.32-1.61) | 0.23 (0.06-0.83) | 0.20 (0.03-1.23) | 0 | 0.79 (0.31-1.96) | 0.60 (0.23-1.59) | Not calculated |
| Odds ratio | 7.5 (2.1-27.0) | 6.3 (0-79.2) | 16.0 (3.2-.) | 25 (3.17-.) | Not available | 1.75 (0.26-12.0) | 3.33 (0.40-27.1) | Not calculated |
| Positive predictive value, % (95% CI) | 60.0 (36.1-80.9) | 33.3 (0.84-90.6) | 50 (26-74) | 41.7 (15.2-72.3) | 66.7 (22.3-95.7) | 42.9 (9.9-81.6) | 66.7 (22.3-95.7) | Not calculated |
| Negative predictive  value, % (95% CI) | 83.3 (65.3-94.4) | 92.6 (75.7-99.1) | 94.1 (80.3-99.3) | 97.2 (85.5-99.9) | 100 (78.2-100) | 70 (34.8-93.3) | 62.5 (24.5-91.5) | Not calculated |
| Number of Missed diagnoses according to GOLD stages | Mild=1/2 Moderate=3/11 Severe=1/3 Very severe=0/1  Total=5/17 | Moderate=2/3 Total=2/3 | Mild= 0/2 Moderate=2/7 Severe=0/2 Total=2/11 | Mild=1/2 Moderate=0/3 Severe=0/1 Total=1/6 | Moderate=0/3 Severe=0/1 Total=0/4 | Mild=1/1 Moderate= 1/2 Severe=1/3 Total=3/6 | Mild=1/2 Moderate=2/2 Severe=0/1 Very severe=0/2  Total= 3/7 | Moderate=0/1 Severe=1/1  Total=1/2 |

(*CHW: Community Health Worker)
